# Supplementary material for: Improving the Thermal and Mechanical Properties of Poly(l-lactide) by Forming Nanocomposites with an in Situ Ring-Opening Intermediate of Poly(l-lactide) and Polyhedral Oligomeric Silsesquioxane
Source: MDPI journal article supplement (doi:10.3390/nano9050748), 2019-05-15
Supplement: s1 [file s1]

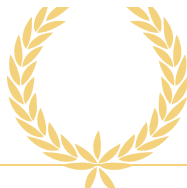

We certify that the following article

## Improve the thermal and mechanical properties of poly(L-lactide) by forming nanocomposites with an in-situ ring-opening intermediate of poly(L-lactide) and polyhedral oligomeric silsesquioxane

Xiu-Xiu Lei, Hao Lu, Lei Lu, Hai-Qing Xu, Ying-Guo Zhou \*, Jun Zou \*

has undergone English language editing by MDPI. The text has been checked for correct use of grammar and common technical terms, and edited to a level suitable for reporting research in a scholarly journal.

MDPI uses experienced, native English speaking editors. Full details of the editing service can be found at

► <https://www.mdpi.com/authors/english>.

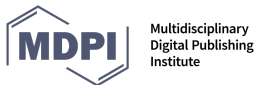

Basel, May 2019

Martyn Rittman, Ph.D.  
English Editing Manager  
[englishediting@mdpi.com](mailto:englishediting@mdpi.com)  
<https://www.mdpi.com/authors/english>
